# Supplementary material for: Groove-assisted solution growth of lead bromide perovskite aligned nanowires: a simple method towards photoluminescent materials with guiding light properties
Source: Royal Society of Chemistry journal article supplement (doi:10.1039/c9qm00210c), 2019-01-01
Supplement: c9qm00210c1.pdf [file c9qm00210c1.pdf]

## Supplementary information

### **Grooves-assisted solution growth of lead bromide Perovskite aligned nanowires: a simple method towards photoluminescent material with guiding light properties**

*Isabelle Rodriguez\*, Roberto Fenollosa, Fernando Ramiro-Manzano, Rocío García-Aboal, Pedro Atienzar, and Francisco J. Meseguer.*

Instituto de Tecnología Química (CSIC-UPV), Universitat Politècnica de València,  
Av. Los Naranjos s/n, 46022 Valencia, Spain

Corresponding author: [mirodrig@upvnet.upv.es](mailto:mirodrig@upvnet.upv.es)

#### Contents of Supporting Information

- S1. Field emission scanning electron microscope (FESEM) images of DVD polycarbonate substrates and PDMS replica
- S2. Field emission scanning electron microscope (FESEM) images of CD polycarbonate substrates and PDMS replica
- S3. MAPbBr<sub>3</sub> nanowires characterization: Optical and FESEM images
- S4. Experimental optical set-up
- S5. CsPbBr<sub>3</sub> nanowires grown on PDMS CD-like substrate. Photoluminescence evolution along the nanowires as function of distance between excitation and collection point.
- S6. Photoluminescence spectra of CsPbBr<sub>3</sub> and MAPbBr<sub>3</sub> films.
- S7. Optical properties of MAPbBr<sub>3</sub> nanowires
- S8. MAPbBr<sub>3</sub> nanowires transferred onto ITO glass substrate

#### Reference

**S1.** Field emission scanning electron microscope (FESEM) images of DVD polycarbonate substrates and PDMS replica

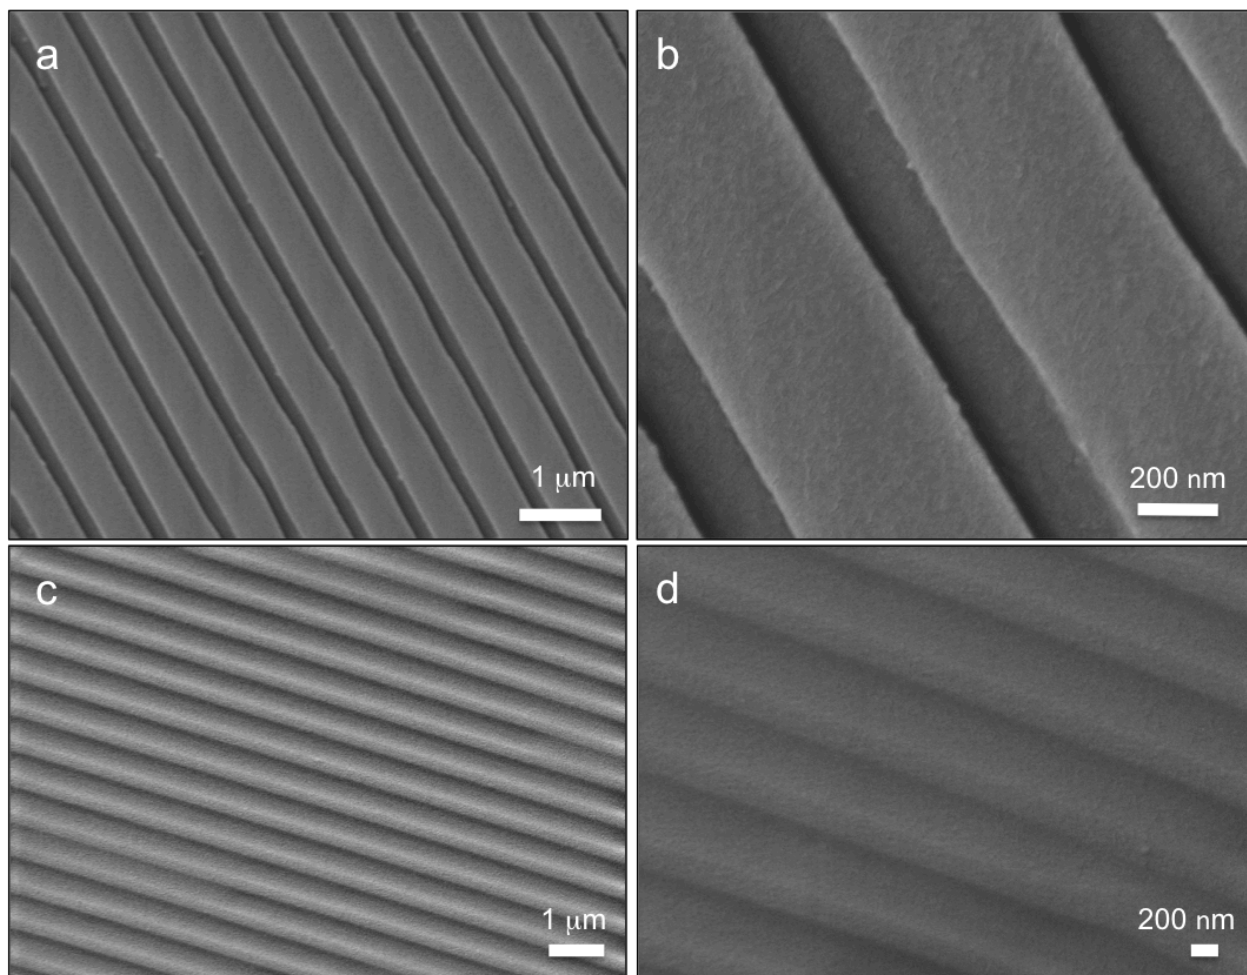

**Fig. S1.** Images taken with a Field emission scanning electron microscope of (a) and (b): a polycarbonate bottom plate of a DVD; (c) and (d) PDMS replica of a polycarbonate bottom plate of a DVD.

**S2.** Field emission scanning electron microscope (FESEM) images of CD polycarbonate substrates and PDMS replica

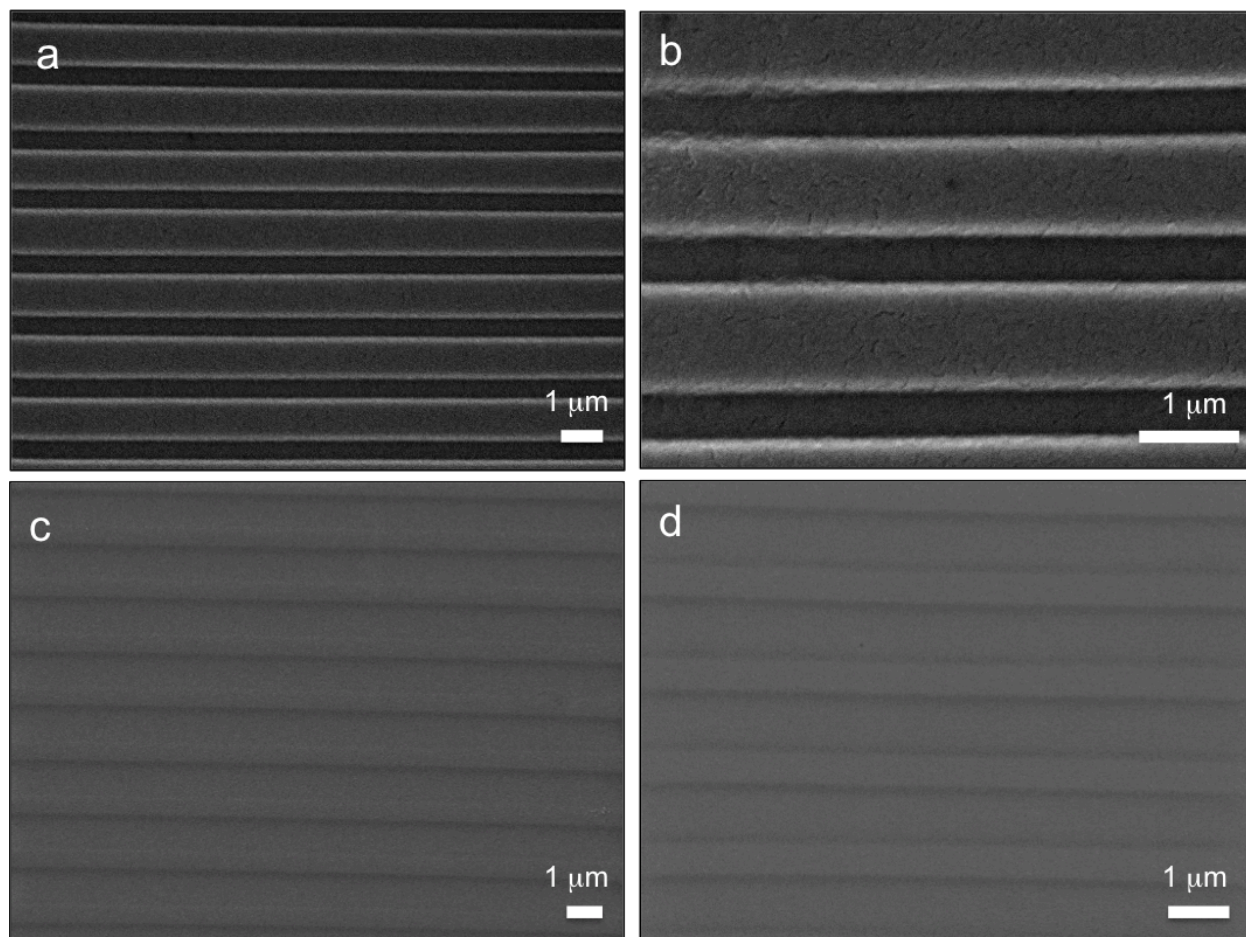

**Fig. S2.** SEM images of (a) and (b): a polycarbonate bottom plate of a CD; (C) and (d) PDMS replica of a polycarbonate plate of a CD.

### S3. MAPbBr<sub>3</sub> nanowires characterization

In the case of MAPbBr<sub>3</sub> nanowires, XRD measurements also reveal a crystalline structure with the characteristic peaks of a cubic structure<sup>15</sup>. However, MAPbBr<sub>3</sub> nanowires seems to crystallize preferentially in the (001) direction compared to a film structured material (Fig. S3 (c)).

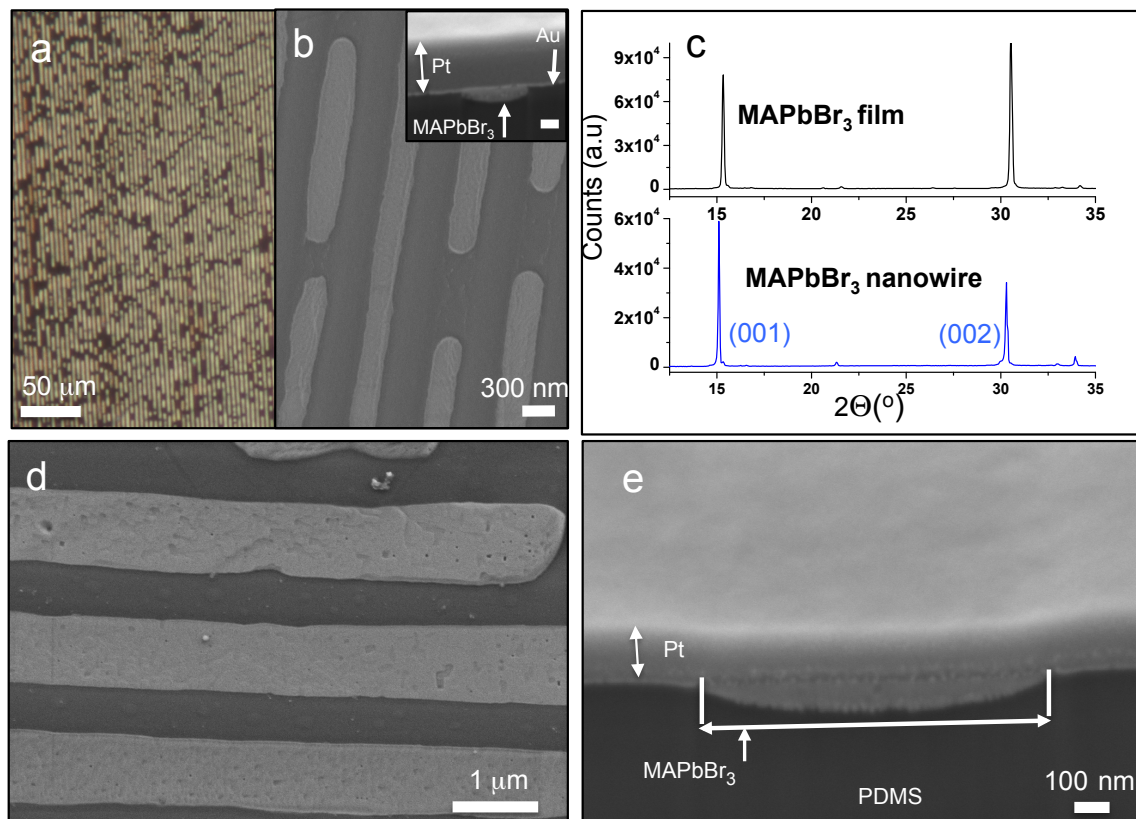

**Fig. S3.** Polycrystalline MAPbBr<sub>3</sub> nanowires characteristics. (a) and (b) optical and FESEM images respectively of MAPbBr<sub>3</sub> nanowires obtained on PDMS replica of DVD structure. Inset: image of perpendicular cut by FIB milling (scale bar: 100 nm) (c) XRD patterns of MAPbBr<sub>3</sub> nanowires and of MAPbBr<sub>3</sub> film structure. (d) FESEM image of MAPbBr<sub>3</sub> synthesized on PDMS template replica of a CD substrate. (e) FESEM image of a transversal cut of a MAPbBr<sub>3</sub> nanowire (grown on CD-like PDMS template) by FIB milling (Sputtered Pt coating was used to cover the sample before the milling)



#### S4. Experimental optical set-up

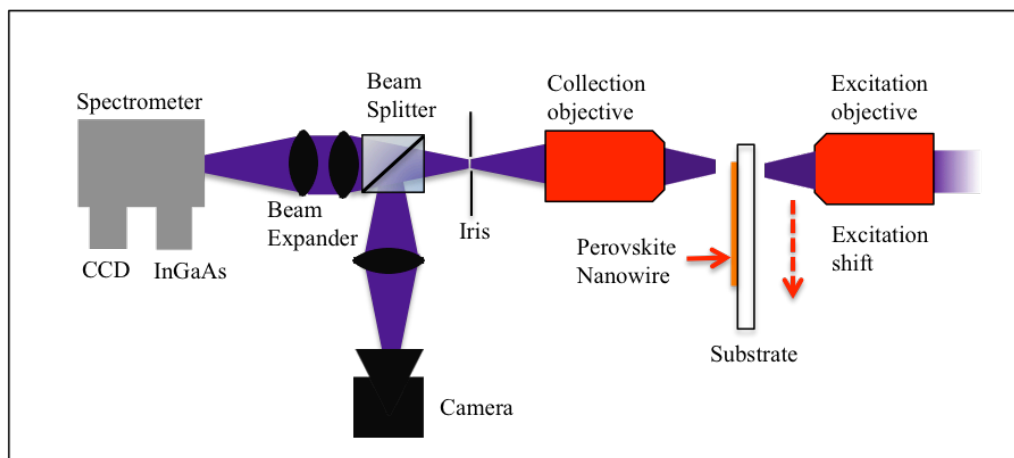

**Fig. S4.** Home made experimental optical setup employed for the study of photoluminescence properties and the light transport phenomenon in single Perovskite nanowires. While the collection objective is focused at one end of the nanowire, the position of the excitation objective is shifted along it.

**S5.** CsPbBr<sub>3</sub> nanowires grown on PDMS CD-like substrate. Photoluminescence evolution along the nanowires as function of distance between excitation and collection point.

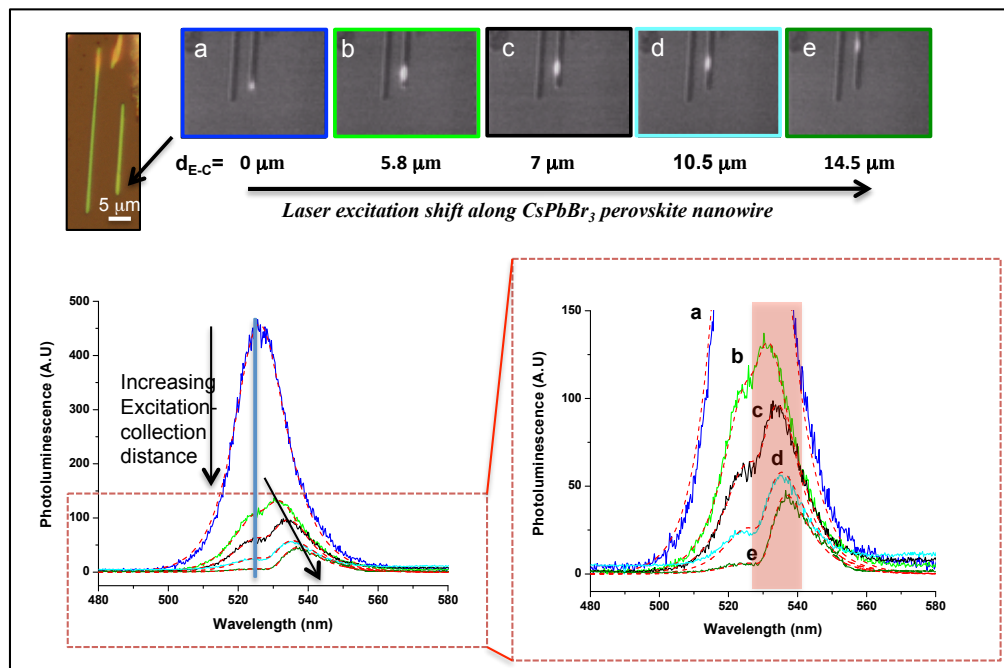

**Fig. S5:** Same as Fig. 4 but for CsPbBr<sub>3</sub> Perovskite nanowires prepared over a PDMS substrate with CD replica features. Top left: color optical microscope image of 2 isolated CsPbBr<sub>3</sub> nanowires. The black arrow indicates the chosen nanowire for PL experiments. Images a, b, c, and d show the nanowire with the spot of the excitation light (white spot) for each  $d_{E-C}$  distance. Below left: Photoluminescence spectrum for each  $d_{E-C}$  distance (blue: 0 μm; light green: 5.8 μm; black: 7 μm; cyan: 10.5 μm; green: 14.5 μm). The Blue line indicates the position of the peak of the primary emission of the PL. Black arrow on the PL spectra shows the shift of the maximum peak of PL that can be seen more easily on the zoom out of the figure (below right) The red fringe indicate the PL maximum

## S6. Photoluminescence spectra of CsPbBr<sub>3</sub> and MAPbBr<sub>3</sub> films

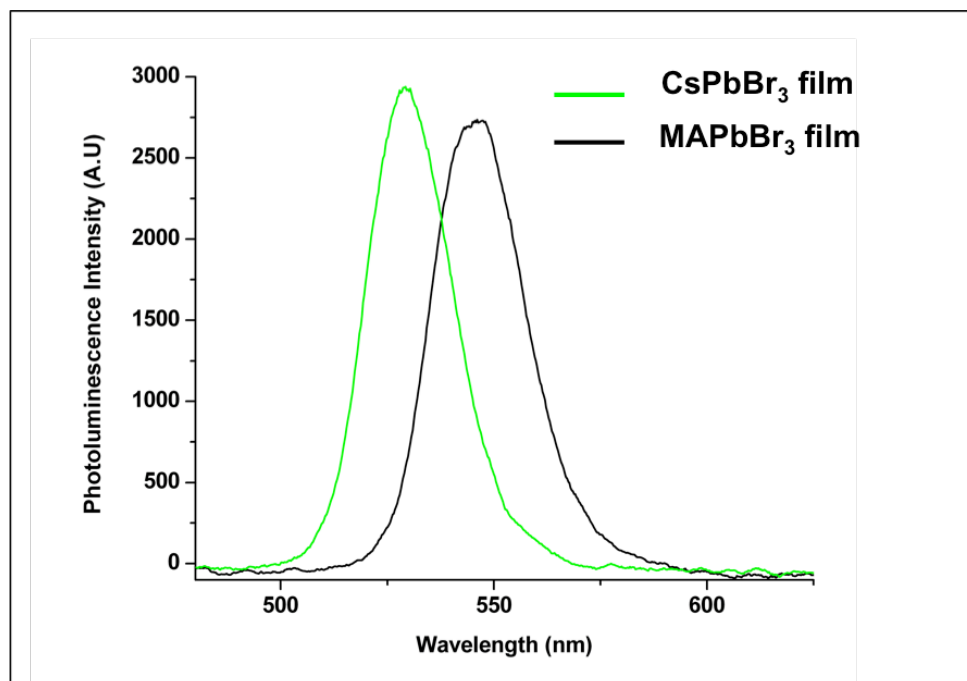

**Fig. S6:** Photoluminescence spectra recorded on a CsPbBr<sub>3</sub> (green line) and MAPbBr<sub>3</sub> (black line) film. The maximum peaks are centered respectively at 530 nm and 546 nm for CsPbBr<sub>3</sub> and MAPbBr<sub>3</sub>

## S7. Optical properties of MAPbBr<sub>3</sub> nanowires

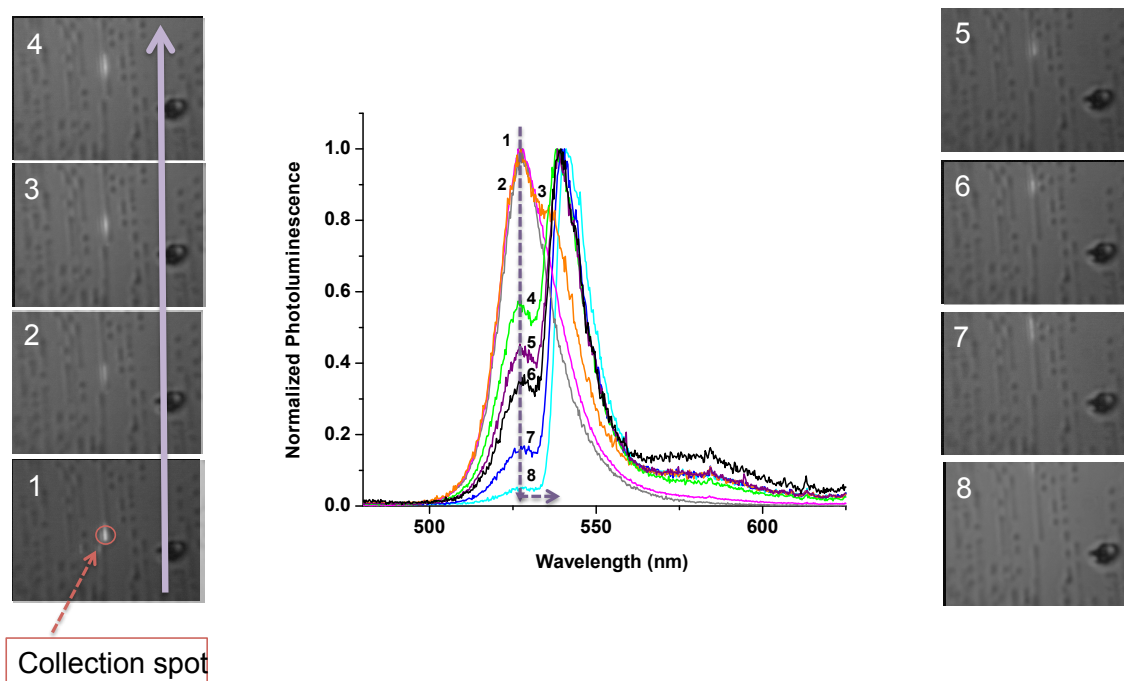

**Fig. S7.** Photoluminescence evolution as increasing collection-excitation distance (labels 1 to 8) for MAPbBr<sub>3</sub> nanowire obtained into the groove of a PDMS replica of DVD substrate. The white spots represent the PL induced by a 405 nm laser excitation.

**S8.** Optical images of transferred MAPbBr<sub>3</sub> nanowires onto ITO substrate

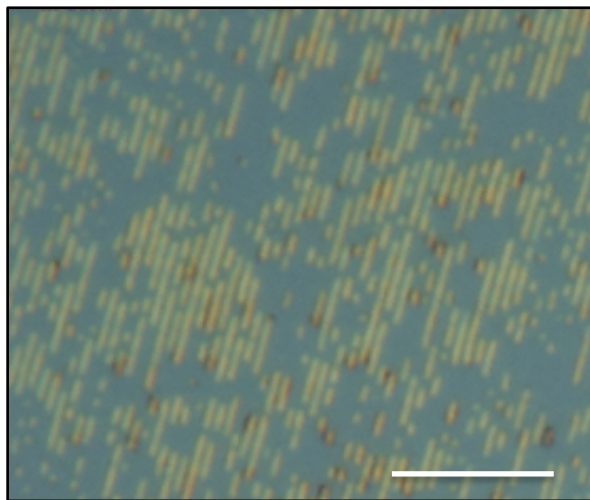

**Fig. S8.** MAPbBr<sub>3</sub> nanowires grown on DVD-like PDMS template transferred onto ITO substrate via gel-pack film. Scale bar:

10 $\mu$ m

## Reference:

- 1S Q. Zhu, K. Zheng, M. Abdellah, A. Generalov, D. Haase, S. Carlson, Y. Niu, J. Heimdal, A. Engdahl, M. E. Messing, T. Pullerits, S. E. Canton, *Phys. Chem. Chem. Phys.* 2016, **18**, 14933
